# Supplementary material
Source: PubMed Central journal article supplement (PMC7272178)
Supplement: mmc1.pdf [file mmc1.pdf]

# THE LANCET Infectious Diseases

## Supplementary webappendix

This webappendix formed part of the original submission and has been peer reviewed. We post it as supplied by the authors.

Supplement to: Strich JR, Warner S, Lai YL, et al. Needs assessment for novel Gram-negative antibiotics in US hospitals: a retrospective cohort study. *Lancet Infect Dis* 2020; published online June 4. [https://doi.org/10.1016/S1473-3099\(20\)30153-5](https://doi.org/10.1016/S1473-3099(20)30153-5).

## Supplemental Material

### Needs Assessment for Novel Gram-Negative Antibiotics in US Hospitals: a Retrospective Cohort Study

Jeffrey R. Strich<sup>1</sup>, Sarah Warner<sup>1</sup>, Yi Ling Lai<sup>2</sup>, Cumhuri Y. Demirkale<sup>1</sup>, John H. Powers III<sup>3</sup>, Robert L. Danner<sup>1</sup>, Sameer S. Kadri<sup>1</sup>

1. Critical Care Medicine Department, National Institutes of Health Clinical Center, Bethesda, MD
2. Epidemiology Unit, Division of Intramural Research, National Institute of Allergy and Infectious Disease, National Institutes of Health, Bethesda, MD
3. Clinical Research Directorate/Clinical Monitoring Research Program, Leidos Biomedical Research, Inc., NCI Campus at Frederick, Maryland

#### Supplemental Methods

**Table S1: Organisms of Interest**

**Table S2: Resistance Phenotype Definitions**

**Table S3: Antibiotic Administrations used as Indicators of True Infection**

**Figure S1: Operational Schematic of Secondary Bloodstream Infection and Episode Window**

**Table S4a: Conservative Empiric Therapy Estimate**

**Table S4b: Liberal Empiric Therapy Estimate**

**Table S4c: Additional Empiric Antibiotics not Included in Overall Analysis**

**Table S5: Treatment Opportunities for Gram Negative Active Antibiotic Against  $\beta$ -Lactam Susceptible Infections Using Conservative and Liberal Treatment Durations**

**Table S6: Demographics of DTR-GNI Encounters by Presumed Site of Infection**

**Table S7: Treatment Opportunities for Gram-negative Active Antibiotic against DTR, CR and ECR Phenotypes for Individual *Enterobacteriaceae* spp.**

**Figure S2: Species Level Comparisons of DTR-GNI and CR-GNI**

**Table S8: DTR-GNI Treatment Opportunities for *Stenotrophomonas maltophilia*<sup>a</sup>, *Burkholderia* spp., and *Achromobacter* spp.**

**Figure S3: Episodes and Targeted Treatment Opportunities for ECR-GNI and Crude Mortality**

**Table S9: Reliability Adjusted DTR-GNI DOT Rates and Absolute Burden by Hospital Characteristics**

**Figure S4: Plot of DTR Days of Therapy Rates by Hospital Admissions and Characteristics**

**Figure S5: Partitioning Analysis Evaluating Hospital Characteristics Associated with Likelihood of Encountering a DTR-GNI**

**Figure S6: Boxplot Distribution of Difficult-to-Treat Resistance (DTR) Episodes per Hospital by Quarter**

**Table S10: Comparison of *Cerner Healthfacts* Database Cohort Hospital Characteristics with American Hospital Association (AHA) Hospital Statistics**

**Table S11: ICD Codes Used to Define Mechanical Ventilation and Neutropenia**

**Figure S7: Data Curation Effects on Study Population**

**References**

## **Supplemental Methods:**

### **Data Source:**

Cerner Health Facts Database is a de-identified, longitudinal and relational electronic health record (EHR) data set containing inpatient and outpatient records generated as a by-product of routine care at CERNER EHR client hospitals in the United States. The Cerner Health Facts Database only includes client hospitals that have agreed to share their data for research purposes. It includes over 300 data elements linked to patient encounters including demographics, diagnosis codes, procedure codes, lab results, medication orders and administrations, vital signs, microbiology and specific hospital characteristics. When compared to the nationally-representative Nationwide Inpatient Sample (Healthcare and Cost Utilization Project, Agency for Healthcare Quality and Research), the overall Cerner Health Facts Database contains relatively similar distribution patterns across patient and hospital characteristics, except with an overrepresentation of smaller (<99-bed) hospitals<sup>1</sup>. Data curation (described below) resulted in selection of hospitals with more complete reporting, including microbiology data. This subset of the overall data used for analysis in our study was also comparable to overall US non-federal acute-care hospitals characterized by the American Hospital Association (AHA) Hospital Statistics across a number of center-level characteristics (Table S10), albeit with minor differences in geographic distribution, and a greater contribution of large hospitals to the Cerner Health Facts study cohort.

### **Data Pruning-Incomplete Reporting:**

To mitigate the impact of incomplete reporting—a common occurrence in real-world EHR datasets—we limited analysis to (a) encounters displaying at least one billing diagnosis code, one laboratory test and one medication order and (b) hospitals with less than 50 percent missingness across pharmacy, microbiology, and encounter-level data respectively. See figure S7.

### **Antibiotic administration:**

Concomitant antibiotic administration was used as a proxy for presumed infection in an attempt to select for cultures that were likely to represent presumed infection and decrease the likelihood of cultures representing colonization. Antibiotic administration was defined as a prescription of a gram-positive agent within two days (to capture empiric therapy intent) or gram-negative agents within five days following the index culture (to capture empiric or targeted therapy intent) (Table S3).

### **Hierarchical Algorithm:**

Monomicrobial and polymicrobial samples were merged. Polymicrobial samples were categorized into a single isolate name based on order of resistance profile [Difficult-to-treat resistance (DTR)> Carbapenem-resistant (CR)>Extended-cephalosporin resistant (ECR)] and subsequent remediation was done using ascending alphabetical order. Index cultures were identified based on the most severe resistance profile (DTR>CR>ECR) over each 14-day interval within an encounter. If two site cultures were positive for the same phenotype in a 14-day period, the one with the earliest draw date was selected. For episodes displaying growth of the same strain from multiple sites, the index site was selected in descending hierarchical order of putative treatment duration (bloodstream>lower respiratory>intra-abdominal>skin and soft tissue>urine>other). Hierarchical selection of taxon, site, and phenotype precluded double counting of treatment episodes for which a patient would already be on a treatment regimen. Index cultures were classified based on site and determined to have an associated secondary bloodstream infection if the same organism and resistance phenotype was identified in blood culture within three days of the index culture as adopted from the National Healthcare Safety Network (NHSN) surveillance definitions for identifying healthcare-associated infections.

### **β-lactam susceptible estimate:**

Estimates for the number of episodes and days-of-therapy for non-resistant (i.e., neither DTR, CR, nor ECR) infections respectively were derived, enabling an understanding of treatment opportunities for DTR gram-negative infection (GNI) relative to non-resistant gram-negative infections. DTR episodes were derived by applying the antibiotic administration filter (to select for true infection) and the hierarchical algorithm (to avoid double counting) across all DTR isolates. These DTR isolate and corresponding episode counts were split by site to generate site-specific isolate-to-episode ratios, which were then individually applied to the count of non-resistant isolates for each site to generate the non-resistant episode and days-of-therapy estimates, thereby bypassing the antibiotic administration and hierarchical algorithm steps.

**Recursive partition analysis:**

The JMP partition platform recursively partitions data according to a relationship between the predictors and response values, creating a decision tree. We used the individual hospital's DTR status (DTR or non-DTR defined by presence or absence of at least 1 DTR isolate among inpatients at that hospital over the study period respectively) as the categorical response variable and hospital's census region, bed size, teaching, urban-rural, and acute status as predictor (explanatory) variables. At each splitting step, the algorithm fits the probabilities estimated for the response levels to choose the explanatory variable minimizing the residual log-likelihood chi-square. The algorithm divides the  $X$  categories of the explanatory variable into two groups of levels and considers all possible groupings into two levels. The same process is applied to each "child" node in a recursive manner until no further gain can be made. Each branch of the tree ends in a terminal node. Each observation falls into one and exactly one terminal node, and each terminal node is uniquely defined by a set of rules. The probability of being a DTR hospital was estimated at each terminal node.

**Number of lives saved calculation:**

We sought to calculate the number of lives that would be saved if DTR mortality was decreased by 50% with a novel antibiotic. In our DTR cohort there were 292 DTR deaths from 2009-2015. Dividing 292 by 6 results in 49 deaths per year. Using the 80x multiplier extrapolating the CERNER cohort size used in this study to the American Health Association data we estimate that there are 3,920 deaths a year in the US associated with DTR infections, indicating nearly 2000 lives saved per year with a 50% reduction in mortality.

**Variable construction:**

ICD-codes used to generate mechanical ventilation and neutropenia are provided in supplemental table S11.

**Table S1: Organisms of Interest**

| Taxa Categories                        | Isolate Names                                 | Taxa Categories                       | Isolate Names                                             |
|----------------------------------------|-----------------------------------------------|---------------------------------------|-----------------------------------------------------------|
| <i>Achromobacter</i> species*          | <i>Achromobacter piechaudii</i>               | <i>Escherichia coli</i> †             | <i>Escherichia coli</i>                                   |
|                                        | <i>Achromobacter</i> species                  |                                       | <i>Escherichia coli</i> ESBL                              |
| <i>Acinetobacter baumannii</i> complex | <i>Acinetobacter baumannii</i>                |                                       | <i>Escherichia coli</i> O157                              |
|                                        | <i>Acinetobacter baumannii/haemolyticus</i>   |                                       | <i>Escherichia coli</i> , Carbapenem resistant            |
| <i>Burkholderia</i> species*           | <i>Burkholderia gladioli</i>                  | <i>Klebsiella</i> species †           | <i>Klebsiella oxytoca</i>                                 |
|                                        | <i>Burkholderia cepacia</i>                   |                                       | <i>Klebsiella oxytoca</i> ESBL                            |
|                                        | <i>Burkholderia picketti</i>                  |                                       | <i>Klebsiella pneumoniae</i>                              |
|                                        | <i>Burkholderia</i> sp.                       |                                       | <i>Klebsiella pneumoniae</i> ESBL                         |
| <i>Citrobacter</i> species †           | <i>Citrobacter amalonaticus</i>               |                                       | <i>Klebsiella pneumoniae</i> ss <i>pneumoniae</i>         |
|                                        | <i>Citrobacter braakii</i>                    |                                       | <i>Klebsiella pneumoniae</i> , Carbapenem resistant       |
|                                        | <i>Citrobacter diversus</i>                   | <i>Morganella</i> species †           | <i>Morganella morganii</i>                                |
|                                        | <i>Citrobacter farmeri</i>                    |                                       | <i>Morganella morganii</i> ss <i>morganii</i>             |
|                                        | <i>Citrobacter freundii</i>                   |                                       | <i>Morganella morganii</i> ss <i>sibonii</i>              |
|                                        | <i>Citrobacter koseri</i> ( <i>diversus</i> ) |                                       | <i>Morganella</i> sp.                                     |
|                                        | <i>Citrobacter sedlakii</i>                   | <i>Pantoea</i> species †              | <i>Pantoea</i> ( <i>Enterobacter</i> ) <i>agglomerans</i> |
|                                        | <i>Citrobacter</i> sp.                        |                                       | <i>Pantoea</i> sp.                                        |
|                                        | <i>Citrobacter werkmanii</i>                  | <i>Proteus</i> species †              | <i>Proteus mirabilis</i>                                  |
|                                        | <i>Citrobacter youngae</i>                    |                                       | <i>Proteus mirabilis</i> / <i>penneri</i>                 |
| <i>Enterobacter</i> species †          | <i>Enterobacter aerogenes</i>                 |                                       | <i>Proteus mirabilis</i> ESBL                             |
|                                        | <i>Enterobacter amnigenus</i>                 |                                       | <i>Proteus penneri</i>                                    |
|                                        | <i>Enterobacter asburiae</i>                  |                                       | <i>Proteus</i> sp.                                        |
|                                        | <i>Enterobacter cancerogenus</i>              |                                       | <i>Proteus vulgaris</i>                                   |
|                                        | <i>Enterobacter cloacae</i>                   |                                       | <i>Proteus vulgaris/Proteus penneri</i>                   |
|                                        | <i>Enterobacter cloacae</i> complex           | <i>Providencia</i> species †          | <i>Providencia rettgeri</i>                               |
|                                        | <i>Enterobacter gergoviae</i>                 |                                       | <i>Providencia rustigianii</i>                            |
|                                        | <i>Enterobacter hormaechei</i>                |                                       | <i>Providencia</i> sp.                                    |
|                                        | <i>Enterobacter intermedium</i>               |                                       | <i>Providencia stuartii</i>                               |
|                                        | <i>Enterobacter sakazakii</i>                 | <i>Pseudomonas aeruginosa</i>         | <i>Pseudomonas aeruginosa</i>                             |
|                                        | <i>Enterobacter</i> sp.                       | <i>Serratia marcescens</i> †          | <i>Serratia marcescens</i>                                |
|                                        | <i>Enterobacter</i> sp., Carbapenem resistant | <i>Stenotrophomonas maltophilia</i> * | <i>Stenotrophomonas maltophilia</i>                       |
|                                        | <i>Enterobacter taylorae</i>                  |                                       |                                                           |

\* Taxa not included in overall potential treatment population estimate and only analyzed individually

† Collapsed into *Enterobacteriaceae* spp.

**Table S2: Resistance Phenotype Definitions**

| Definitions                                 | Agents Included                                    | Defining Criteria                                                                                                                                                                    |
|---------------------------------------------|----------------------------------------------------|--------------------------------------------------------------------------------------------------------------------------------------------------------------------------------------|
| Carbapenem Resistance*                      | imipenem, meropenem, doripenem, ertapenem †        | Resistance to $\geq 1$ carbapenem ( <i>Enterobacteriaceae</i> ); intermediate or resistant to $\geq 1$ carbapenem ( <i>Pseudomonas aeruginosa</i> , <i>Acinetobacter baumannii</i> ) |
| Extended-spectrum cephalosporin-resistance* | ceftazidime, cefepime, ceftriaxone ‡, cefotaxime ‡ | Resistance to $\geq 1$ extended-spectrum cephalosporin                                                                                                                               |
| Difficult-to-treat resistance <sup>2§</sup> |                                                    | Intermediate or resistant to all reported agents in carbapenem, $\beta$ -lactam, and fluoroquinolone categories (including additional agents ¶,** when results available)            |

\* Based on 2015 Centers for Disease Control definitions

† Applicable for Enterobacteriaceae spp. only

‡ Not applicable for *P. aeruginosa* and *Burkholderia* species

§ DTR assessment requires in vitro testing against  $>1$  carbapenem,  $>1$  extended spectrum cephalosporin, and  $>1$  fluoroquinolone except for *S. maltophilia* which required testing to trimethoprim-sulfamethoxazole and levofloxacin only

¶ Intermediate or resistant to trimethoprim-sulfamethoxazole instead of carbapenems (*S. maltophilia* only).

\*\* Intermediate or resistant to piperacillin-tazobactam and ampicillin-sulbactam (*A. baumannii* only), intermediate or resistant to aztreonam (not applicable for *A. baumannii*). These drugs were only included in the assessment of DTR when results reported.

**Table S3: Antibiotic Administrations Used as Clinical Indicators of True Infections**

| Definition                                                                                                                                 | Antibiotics Included                                                                                                                                                                                                                                                                                                                                                                                                                                                                                                                                                                                                                                                                                                                                                                                                                                                                                                                                      |
|--------------------------------------------------------------------------------------------------------------------------------------------|-----------------------------------------------------------------------------------------------------------------------------------------------------------------------------------------------------------------------------------------------------------------------------------------------------------------------------------------------------------------------------------------------------------------------------------------------------------------------------------------------------------------------------------------------------------------------------------------------------------------------------------------------------------------------------------------------------------------------------------------------------------------------------------------------------------------------------------------------------------------------------------------------------------------------------------------------------------|
| Antibiotic administered on day of or day following index culture (day +1) – selective for Gram-positive organisms*                         | clindamycin, lincomycin, linezolid, oritavancin, tedizolid, telavancin, vancomycin (intravenous only)                                                                                                                                                                                                                                                                                                                                                                                                                                                                                                                                                                                                                                                                                                                                                                                                                                                     |
| Antibiotics administered on day of or day following index culture (day +1) – selective for Gram-positive organisms at non-respiratory site | daptomycin                                                                                                                                                                                                                                                                                                                                                                                                                                                                                                                                                                                                                                                                                                                                                                                                                                                                                                                                                |
| Antibiotic administered on day of index culture and/or up to day 5 following the culture (Day +5)—selective for Gram negative organisms†   | amikacin, amoxicillin, amoxicillin/clavulanate, ampicillin, ampicillin/sulbactam, azithromycin, aztreonam, cefaclor, cefadroxil, cefamandole, cefazolin, cefdinir, cefditoren, cefepime, cefixime, cefoperazone, cefotaxime, cefotetan, cefoxitin, cefpodoxime, cefprozil, ceftaroline, ceftazidime, ceftazidime/avibactam, ceftibuten, ceftizoxime, ceftolozane/tazobactam, ceftriaxone, cefuroxime, cephalixin, cephalirin, cephradine, chloramphenicol, cinoxacin, ciprofloxacin, clarithromycin, cloxacillin, colistin, dicloxacillin, doripenem, doxycycline, ertapenem, erythromycin, erythromycin/sulfisoxazole, fosfomicin, gatifloxacin, gentamicin, imipenem, kanamycin, metronidazole, mezlocillin, minocycline, moxifloxacin, nafcillin, nitrofurantoin, norfloxacin, ofloxacin, oxacillin, penicillin, piperacillin, polymyxin B, tetracycline, ticarcillin, ticarcillin/clavulanate, tigecycline, tobramycin, trimethoprim/sulfamethoxazole |

\*Gram-positive agents used on day of culture or the following day consistent with empiric antibiotic therapy and indicating clinician concern for infection in the absence of microbiology data

†Gram-negative agents used on day of culture and/or up to day 5 thereafter to indicate targeted therapy

**Figure S1: Operational Schematic of Secondary Bloodstream Infection and Episode Window**

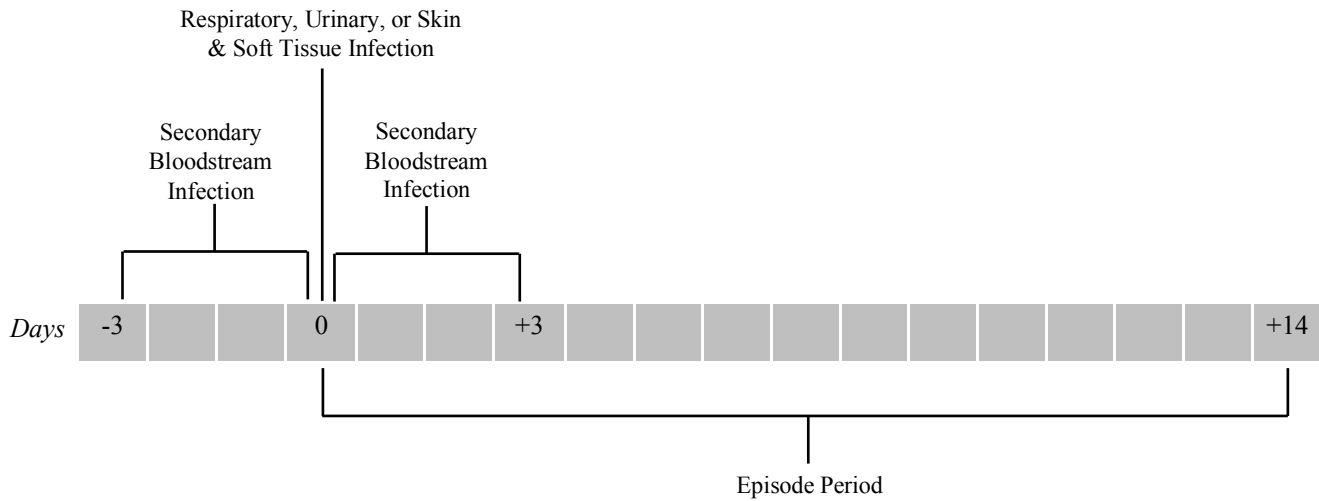

**Legend:** Index cultures were determined by the most resistant isolate (DTR>CR>ECR) in 14-day intervals. Index cultures were classified by site and evaluated for secondary bloodstream infection if there was a positive culture within +/- 3 days with the same organism and phenotype. After the defined episode was established, no further analysis was performed within the 14-day episode period (i.e., if a positive culture was present in the 14-day window meeting one of the resistance phenotypes of interested, it was not included in the overall market size estimate because the episode was already assigned as a treatment opportunity). For encounters that were longer than 14-days, repeat episodes were evaluated in 14-day intervals.



**Table S4a: Conservative Empiric Therapy Estimate**

|                                            | Episodes*    | DOT          | DOT/10,000 Encounters |
|--------------------------------------------|--------------|--------------|-----------------------|
| 1 Day of Colistin/Polymyxin B <sup>†</sup> | 1,728        | 1,728        | 5.8                   |
| 2 Days of Colistin/Polymyxin B             | 37           | 74           | 0.2                   |
| <b>Total Colistin/Polymyxin B</b>          | <b>1,765</b> | <b>1,802</b> | <b>6.0</b>            |

**Table S4b: Liberal Empiric Therapy Estimate**

|                                            | Episodes*     | DOT           | DOT/10,000 Encounters |
|--------------------------------------------|---------------|---------------|-----------------------|
| 1 Day of Colistin/Polymyxin B <sup>†</sup> | 1,728         | 1,728         | 5.8                   |
| 2 Days of Colistin/Polymyxin B             | 37            | 74            | 0.2                   |
| 1 Day of Aminoglycosides <sup>‡§</sup>     | 12,414        | 12,414        | 41.4                  |
| 2 Days of Aminoglycosides                  | 4,218         | 8,436         | 28.2                  |
| <b>Total Empiric Therapy</b>               | <b>18,397</b> | <b>22,652</b> | <b>75.6</b>           |

**Table S4c: Additional Empiric Antibiotics<sup>¶</sup> not Included in Overall Analysis**

|                                | Episodes* | DOT  | DOT/10,000 Encounters |
|--------------------------------|-----------|------|-----------------------|
| 1 Day of Tigecycline           | 271       | 271  | 0.9                   |
| 2 Days of Tigecycline          | 270       | 540  | 1.8                   |
| 3 Days of Tigecycline          | 234       | 702  | 2.3                   |
| 3 Days of Colistin/Polymyxin-B | 35        | 105  | 0.4                   |
| 3 Days of Aminoglycosides      | 2026      | 6078 | 20.3                  |

\* Episodes with multiple instances of 2-days or less within a 14-day period were excluded as were episodes where the last day of antibiotic administration and discharge day were the same.

<sup>†</sup> Colistin and polymyxin B mapped as a single variable in dataset

<sup>‡</sup> Aminoglycosides include amikacin, gentamicin, and tobramycin

<sup>§</sup> Encounters admitted to an obstetric service or with a diagnosis code for non-tuberculosis mycobacterial infections were removed due to potential non-DTR indications for aminoglycoside therapy

<sup>¶</sup> Investigated for prevalence within dataset but not included in overall analysis

**Table S5: Treatment Opportunities for Gram Negative Active Antibiotic Against  $\beta$ -Lactam Susceptible Infections Using Conservative\* and Liberal† Treatment Durations**

|                                 | Culture Site               | Site-specific episode-to-isolate ratio‡ | Raw Isolate Count§ | Confirmed Infection Episodes¶ | DOT of Confirmed Infections |
|---------------------------------|----------------------------|-----------------------------------------|--------------------|-------------------------------|-----------------------------|
| Conservative Treatment Duration | Urinary (5 DOT)            | 0.56                                    | 99,645             | 55,637                        | 27,8187                     |
|                                 | Intra-abdominal (7 DOT)    | 0.57                                    | 8,072              | 4,567                         | 31,969                      |
|                                 | Lower Respiratory (8 DOT)  | 0.60                                    | 19,232             | 11,513                        | 92,108                      |
|                                 | Skin Soft Tissue (5 DOT)   | 0.58                                    | 17,145             | 9,957                         | 49,786                      |
|                                 | Other (5 DOT)              | 0.41                                    | 4,067              | 1,675                         | 8,373                       |
|                                 | Bloodstream (14 DOT)       | 0.79                                    | 20,999             | 16,673                        | 233,416                     |
|                                 | <b>Total</b>               | <b>0.59</b>                             | <b>169,160</b>     | <b>100,022</b>                | <b>693,839</b>              |
| <b>Per 10,000 encounters</b>    | --                         | <b>564.6</b>                            | <b>333.8</b>       | <b>2,315.7</b>                |                             |
| Liberal Treatment Duration      | Urinary (14 DOT)           | 0.56                                    | 99,645             | 55,637                        | 778,923                     |
|                                 | Intra-abdominal (14 DOT)   | 0.57                                    | 8,072              | 4,567                         | 63,939                      |
|                                 | Lower Respiratory (14 DOT) | 0.60                                    | 19,232             | 11,513                        | 161,189                     |
|                                 | Skin Soft Tissue (14 DOT)  | 0.58                                    | 17,145             | 9,957                         | 139,402                     |
|                                 | Other (14 DOT)             | 0.41                                    | 4,067              | 1,675                         | 23,445                      |
|                                 | Bloodstream (14 DOT)       | 0.79                                    | 20,999             | 16,673                        | 233,416                     |
|                                 | <b>Total</b>               | <b>0.59</b>                             | <b>169,160</b>     | <b>100,022</b>                | <b>1,400,313</b>            |
| <b>Per 10,000 encounters</b>    | --                         | <b>564.6</b>                            | <b>333.8</b>       | <b>4,673.5</b>                |                             |

\* Conservative treatment duration as per guideline review and clinical practice recommendations.<sup>3-6</sup> Since no guidelines exist for bacteremia a 14-day treatment course was selected arbitrarily.

† Treatment duration of 14 days for all sites.

‡ The site-specific episode-to-isolate ratios were derived from the site-specific drop from DTR isolates to episode counts after the application of both antibiotic administration filter and hierarchical algorithm. 2,288 DTR isolates were identified prior to antibiotic administration and hierarchical algorithms (754 urinary, 76 intra-abdominal, 897 lower respiratory, 260 skin soft tissue, 102 other, 199 bloodstream) which were used to calculate the site-specific multiplier based on the confirmed infection episode counts shown in Table 1.

§ Raw infection isolates is the total number of isolates prior to antibiotic administration and hierarchical algorithm.

¶ Confirmed infections episodes is calculated by multiplying the raw infection isolates by the infection confirmation rate.

**Table S6: Demographics of DTR-GNI Encounters by Presumed Site of Infection**

|                                       | Blood      | Lower Respiratory | Urinary    | Skin & Soft Tissue | Intra-abdominal | All Sites*  |
|---------------------------------------|------------|-------------------|------------|--------------------|-----------------|-------------|
| Age Category – no.(%)                 |            |                   |            |                    |                 |             |
| 0 years                               | 0 (0)      | 2 (0-4)           | 0 (0)      | 0 (0)              | 0 (0)           | 2 (0-2)     |
| 1-17 years                            | 5 (3-2)    | 22 (4-1)          | 7 (1-7)    | 1 (0-7)            | 1 (2-3)         | 37 (2-8)    |
| 18-44 years                           | 31 (19-7)  | 110 (20-6)        | 67 (16-4)  | 32 (21-6)          | 4 (9-3)         | 259 (19-5)  |
| 45-64 years                           | 59 (37-6)  | 175 (32-8)        | 126 (30-9) | 52 (35-1)          | 18 (41-9)       | 447 (33-6)  |
| 65+ years                             | 62 (39-5)  | 225 (42-1)        | 208 (51)   | 63 (42-6)          | 20 (46-5)       | 584 (43-9)  |
| Gender – no.(%)                       |            |                   |            |                    |                 |             |
| Female                                | 58 (36-7)  | 229 (42-6)        | 204 (48-5) | 68 (45)            | 22 (51-2)       | 604 (44-7)  |
| Male                                  | 100 (63-3) | 308 (57-4)        | 217 (51-5) | 83 (55)            | 21 (48-8)       | 748 (55-3)  |
| Race – no.(%)                         |            |                   |            |                    |                 |             |
| Black                                 | 60 (38)    | 121 (22-5)        | 130 (30-9) | 68 (45)            | 10 (23-3)       | 411 (30-4)  |
| White                                 | 81 (51-3)  | 338 (62-9)        | 260 (61-8) | 71 (47)            | 27 (62-8)       | 797 (58-9)  |
| Other                                 | 17 (10-8)  | 78 (14-5)         | 31 (7-4)   | 12 (7-9)           | 6 (14)          | 144 (10-7)  |
| ICU Admission on Culture Day – no.(%) | 56 (35-4)  | 213 (39-7)        | 76 (18-1)  | 34 (22-5)          | 12 (27-9)       | 407 (30-1)  |
| Neutropenia – no.(%)                  | 7 (4-4)    | 3 (0-6)           | 4 (1)      | 1 (0-7)            | 0 (0)           | 15 (1-1)    |
| Mechanical Ventilation – no. (%)      | 58 (36-7)  | 221 (41-2)        | 70 (16-6)  | 21 (13-9)          | 7 (16-3)        | 391 (28-9)  |
| Isolate Name – no.(%)                 |            |                   |            |                    |                 |             |
| <i>Acinetobacter baumannii</i>        | 48 (30-4)  | 167 (31-1)        | 75 (17-8)  | 65 (43)            | 12 (27-9)       | 387 (28-6)  |
| <i>Escherichia coli</i>               | 5 (3-2)    | 3 (0-6)           | 19 (4-5)   | 3 (2)              | 2 (4-7)         | 32 (2-4)    |
| <i>Enterobacter</i> spp.              | 4 (2-5)    | 7 (1-3)           | 18 (4-3)   | 4 (2-6)            | 1 (2-3)         | 36 (2-7)    |
| <i>Klebsiella</i> spp.                | 61 (38-6)  | 82 (15-3)         | 181 (43)   | 26 (17-2)          | 11 (25-6)       | 368 (27-2)  |
| Other <i>Enterobacteriaceae</i> spp.† | 2 (1-3)    | 3 (0-6)           | 4 (1)      | 6 (4)              | 0 (0)           | 15 (1-1)    |
| <i>Pseudomonas aeruginosa</i>         | 38 (24-1)  | 275 (51-2)        | 124 (29-5) | 47 (31-1)          | 17 (39-5)       | 514 (38)    |
| Patient Deceased – no.(%)             | 62 (39-2)  | 120 (22-4)        | 42 (10)    | 17 (11-3)          | 8 (18-6)        | 254 (18-8)  |
| Elixhauser – median(IQR)              | 4 (3-4)    | 4 (3-4)           | 4 (3-4)    | 4 (3-4)            | 3 (3-4)         | 4 (2-6)     |
| Culture-day SOFA Score – median(IQR)  | 4 (3-5)    | 3 (3-5)           | 2 (1-4)    | 2 (1-4)            | 2 (1-4)         | 2 (1-5)     |
| Census Region – no.(%)                |            |                   |            |                    |                 |             |
| Midwest                               | 29 (18-4)  | 45 (8-4)          | 57 (13-5)  | 38 (25-2)          | 8 (18-6)        | 182 (13-5)  |
| Northeast                             | 44 (27-9)  | 162 (30-2)        | 141 (33-5) | 29 (19-2)          | 9 (20-9)        | 390 (28-8)  |
| South                                 | 79 (50)    | 254 (47-3)        | 191 (45-5) | 77 (51)            | 19 (44-2)       | 644 (47-6)  |
| West                                  | 6 (3-8)    | 76 (14-2)         | 32 (7-6)   | 7 (4-6)            | 7 (16-3)        | 136 (10-1)  |
| Bed Size Range – no.(%)               |            |                   |            |                    |                 |             |
| <100                                  | 6 (9-1)    | 30 (5-6)          | 21 (5-0)   | 4 (2-6)            | 1 (2-3)         | 66 (4-9)    |
| 100-299                               | 44 (11-7)  | 129 (24-0)        | 121 (28-7) | 56 (37-1)          | 14 (32-6)       | 376 (27-8)  |
| 300+                                  | 108 (11-9) | 378 (70-4)        | 279 (66-3) | 91 (60-3)          | 28 (67-6)       | 910 (67-3)  |
| Urban Hospital – no.(%)               | 114 (72-2) | 374 (69-7)        | 309 (73-4) | 133 (88-1)         | 30 (69-8)       | 992 (73-4)  |
| Teaching Facility – no.(%)            | 135 (85-4) | 433 (80-6)        | 337 (80-1) | 132 (87-4)         | 32 (74-4)       | 1097 (81-1) |

\*Inclusive of those infections not categorized as blood, lower respiratory, urinary, skin & soft tissue, or intra-abdominal

†Composed of *Citrobacter* spp., *Morganella* spp., *Pantoea* spp., *Proteus* spp., *Providencia* spp., *Serratia marcescens*

**Table S7: Treatment Opportunities for Gram Negative Active Antibiotic Against DTR, CR, and ECR Phenotypes for Individual Enterobacteriaceae spp.\*†‡**

| <i>Citrobacter</i> spp.<br>Culture Site | DTR      |           | CR        |           | ECR        |             |
|-----------------------------------------|----------|-----------|-----------|-----------|------------|-------------|
|                                         | Episodes | DOT       | Episodes  | DOT       | Episodes   | DOT         |
| Urinary (5 DOT)                         | 2        | 10        | 6         | 30        | 287        | 1435        |
| Intra-abdominal (7 DOT)                 | 0        | 0         | 0         | 0         | 10         | 70          |
| Respiratory (8 DOT)                     | 2        | 16        | 2         | 16        | 24         | 192         |
| Skin Soft Tissue (5 DOT)                | 1        | 5         | 2         | 10        | 20         | 100         |
| Other (5 DOT)                           | 0        | 0         | 0         | 0         | 6          | 30          |
| Primary Blood Stream (14 DOT)           | 2        | 28        | 1         | 14        | 23         | 322         |
| Secondary Blood Stream (14 DOT)         | 0        | 0         | 0         | 0         | 2          | 28          |
| <b>Total</b>                            | <b>7</b> | <b>59</b> | <b>11</b> | <b>70</b> | <b>372</b> | <b>2177</b> |
| <b>DOT per 10,000 Encounters</b>        |          | 0.20      |           | 0.23      |            | 7.3         |

| <i>Pantoea</i> spp.<br>Culture Site | DTR      |          | CR       |           | ECR       |           |
|-------------------------------------|----------|----------|----------|-----------|-----------|-----------|
|                                     | Episodes | DOT      | Episodes | DOT       | Episodes  | DOT       |
| Urinary (5 DOT)                     | 0        | 0        | 0        | 0         | 5         | 25        |
| Intra-abdominal (7 DOT)             | 0        | 0        | 0        | 0         | 0         | 0         |
| Respiratory (8 DOT)                 | 0        | 0        | 0        | 0         | 2         | 16        |
| Skin Soft Tissue (5 DOT)            | 1        | 5        | 0        | 0         | 1         | 5         |
| Other (5 DOT)                       | 0        | 0        | 0        | 0         | 0         | 0         |
| Primary Blood Stream (14 DOT)       | 0        | 0        | 5        | 70        | 2         | 28        |
| Secondary Blood Stream (14 DOT)     | 0        | 0        | 0        | 0         | 0         | 0         |
| <b>Total</b>                        | <b>1</b> | <b>5</b> | <b>5</b> | <b>70</b> | <b>10</b> | <b>74</b> |
| <b>DOT per 10,000 Encounters</b>    |          | 0.02     |          | 0.23      |           | 0.25      |

| <i>Enterobacter</i> spp.<br>Culture Site | DTR       |            | CR         |            | ECR         |             |
|------------------------------------------|-----------|------------|------------|------------|-------------|-------------|
|                                          | Episodes  | DOT        | Episodes   | DOT        | Episodes    | DOT         |
| Urinary (5 DOT)                          | 18        | 90         | 53         | 265        | 699         | 3495        |
| Intra-abdominal (7 DOT)                  | 1         | 7          | 16         | 112        | 66          | 462         |
| Respiratory (8 DOT)                      | 8         | 64         | 19         | 152        | 313         | 2504        |
| Skin Soft Tissue (5 DOT)                 | 4         | 20         | 8          | 40         | 152         | 760         |
| Other (5 DOT)                            | 2         | 10         | 6          | 30         | 32          | 160         |
| Primary Blood Stream (14 DOT)            | 3         | 42         | 15         | 210        | 128         | 1792        |
| Secondary Blood Stream (14 DOT)          | 1         | 14         | 0          | 0          | 31          | 434         |
| <b>Total</b>                             | <b>37</b> | <b>247</b> | <b>117</b> | <b>809</b> | <b>1421</b> | <b>9607</b> |
| <b>DOT per 10,000 Encounters</b>         |           | 0.82       |            | 2.7        |             | 32.1        |

| <i>Proteus</i> spp.<br>Culture Site | DTR      |           | CR        |            | ECR        |             |
|-------------------------------------|----------|-----------|-----------|------------|------------|-------------|
|                                     | Episodes | DOT       | Episodes  | DOT        | Episodes   | DOT         |
| Urinary (5 DOT)                     | 1        | 5         | 46        | 230        | 370        | 1850        |
| Intra-abdominal (7 DOT)             | 0        | 0         | 3         | 21         | 11         | 77          |
| Respiratory (8 DOT)                 | 0        | 0         | 11        | 88         | 51         | 408         |
| Skin Soft Tissue (5 DOT)            | 2        | 10        | 11        | 55         | 88         | 440         |
| Other (5 DOT)                       | 0        | 0         | 3         | 15         | 12         | 60          |
| Primary Blood Stream (14 DOT)       | 0        | 0         | 7         | 98         | 34         | 476         |
| Secondary Blood Stream (14 DOT)     | 0        | 0         | 0         | 0          | 19         | 266         |
| <b>Total</b>                        | <b>3</b> | <b>15</b> | <b>81</b> | <b>507</b> | <b>585</b> | <b>3577</b> |
| <b>DOT per 10,000 Encounters</b>    |          | 0.05      |           | 1.7        |            | 11.9        |

| <i>Escherichia coli</i><br>Culture Site | DTR       |            | CR        |            | ECR         |              |
|-----------------------------------------|-----------|------------|-----------|------------|-------------|--------------|
|                                         | Episodes  | DOT        | Episodes  | DOT        | Episodes    | DOT          |
| Urinary (5 DOT)                         | 19        | 95         | 59        | 295        | 3182        | 15910        |
| Intra-abdominal (7 DOT)                 | 2         | 14         | 8         | 56         | 123         | 861          |
| Respiratory (8 DOT)                     | 4         | 32         | 5         | 40         | 230         | 1840         |
| Skin Soft Tissue (5 DOT)                | 3         | 15         | 1         | 5          | 154         | 770          |
| Other (5 DOT)                           | 0         | 0          | 1         | 5          | 40          | 200          |
| Primary Blood Stream (14 DOT)           | 5         | 70         | 6         | 84         | 402         | 5628         |
| Secondary Blood Stream (14 DOT)         | 0         | 0          | 0         | 0          | 250         | 3500         |
| <b>Total</b>                            | <b>33</b> | <b>226</b> | <b>80</b> | <b>485</b> | <b>4381</b> | <b>28709</b> |
| <b>DOT per 10,000 Encounters</b>        |           | 0.75       |           | 1.6        |             | 95.8         |

| <i>Serratia</i> spp.<br>Culture Site | DTR      |           | CR        |            | ECR        |            |
|--------------------------------------|----------|-----------|-----------|------------|------------|------------|
|                                      | Episodes | DOT       | Episodes  | DOT        | Episodes   | DOT        |
| Urinary (5 DOT)                      | 1        | 5         | 4         | 20         | 30         | 150        |
| Intra-abdominal (7 DOT)              | 0        | 0         | 1         | 7          | 2          | 14         |
| Respiratory (8 DOT)                  | 0        | 0         | 8         | 64         | 48         | 384        |
| Skin Soft Tissue (5 DOT)             | 1        | 5         | 3         | 15         | 21         | 105        |
| Other (5 DOT)                        | 0        | 0         | 3         | 15         | 12         | 60         |
| Primary Blood Stream (14 DOT)        | 0        | 0         | 4         | 56         | 16         | 224        |
| Secondary Blood Stream (14 DOT)      | 0        | 0         | 0         | 0          | 3          | 42         |
| <b>Total</b>                         | <b>2</b> | <b>10</b> | <b>23</b> | <b>177</b> | <b>132</b> | <b>979</b> |
| <b>DOT per 10,000 Encounters</b>     |          | 0.03      |           | 0.59       |            | 3.3        |

| <i>Klebsiella</i> spp.<br>Culture Site | DTR        |             | CR        |            | ECR         |             |
|----------------------------------------|------------|-------------|-----------|------------|-------------|-------------|
|                                        | Episodes   | DOT         | Episodes  | DOT        | Episodes    | DOT         |
| Urinary (5 DOT)                        | 181        | 905         | 32        | 160        | 853         | 4265        |
| Intra-abdominal (7 DOT)                | 11         | 77          | 5         | 35         | 32          | 224         |
| Respiratory (8 DOT)                    | 84         | 672         | 22        | 176        | 221         | 1768        |
| Skin Soft Tissue (5 DOT)               | 26         | 130         | 5         | 25         | 93          | 465         |
| Other (5 DOT)                          | 8          | 40          | 3         | 15         | 23          | 115         |
| Primary Blood Stream (14 DOT)          | 42         | 588         | 14        | 196        | 146         | 2044        |
| Secondary Blood Stream (14 DOT)        | 19         | 266         | 4         | 56         | 49          | 686         |
| <b>Total</b>                           | <b>371</b> | <b>2678</b> | <b>85</b> | <b>663</b> | <b>1417</b> | <b>9567</b> |
| <b>DOT per 10,000 Encounters</b>       |            | 8.9         |           | 2.2        |             | 31.9        |

| <i>Providencia</i> spp.<br>Culture Site | DTR      |          | CR        |            | ECR        |            |
|-----------------------------------------|----------|----------|-----------|------------|------------|------------|
|                                         | Episodes | DOT      | Episodes  | DOT        | Episodes   | DOT        |
| Urinary (5 DOT)                         | 0        | 0        | 10        | 50         | 55         | 275        |
| Intra-abdominal (7 DOT)                 | 0        | 0        | 1         | 7          | 1          | 7          |
| Respiratory (8 DOT)                     | 1        | 8        | 3         | 24         | 13         | 104        |
| Skin Soft Tissue (5 DOT)                | 0        | 0        | 4         | 20         | 19         | 95         |
| Other (5 DOT)                           | 0        | 0        | 0         | 0          | 6          | 30         |
| Primary Blood Stream (14 DOT)           | 0        | 0        | 1         | 14         | 9          | 126        |
| Secondary Blood Stream (14 DOT)         | 0        | 0        | 1         | 14         | 2          | 28         |
| <b>Total</b>                            | <b>1</b> | <b>8</b> | <b>20</b> | <b>129</b> | <b>105</b> | <b>665</b> |
| <b>DOT per 10,000 Encounters</b>        |          | 0.03     |           | 0.43       |            | 2.2        |

| <i>Morganella</i> spp.<br>Culture Site | DTR      |          | CR        |            | ECR        |             |
|----------------------------------------|----------|----------|-----------|------------|------------|-------------|
|                                        | Episodes | DOT      | Episodes  | DOT        | Episodes   | DOT         |
| Urinary (5 DOT)                        | 0        | 0        | 9         | 45         | 108        | 540         |
| Intra-abdominal (7 DOT)                | 0        | 0        | 0         | 0          | 4          | 28          |
| Respiratory (8 DOT)                    | 0        | 0        | 3         | 24         | 13         | 104         |
| Skin Soft Tissue (5 DOT)               | 1        | 5        | 1         | 5          | 25         | 125         |
| Other (5 DOT)                          | 0        | 0        | 0         | 0          | 3          | 15          |
| Primary Blood Stream (14 DOT)          | 0        | 0        | 3         | 42         | 14         | 196         |
| Secondary Blood Stream (14 DOT)        | 0        | 0        | 1         | 14         | 1          | 14          |
| <b>Total</b>                           | <b>1</b> | <b>5</b> | <b>17</b> | <b>130</b> | <b>168</b> | <b>1022</b> |
| <b>DOT per 10,000 Encounters</b>       |          | 0.02     |           | 0.43       |            | 3.4         |

\*Hierarchical algorithm for generating market size estimates was applied to individual datasets that included only the organism of interest  
†All categories (DTR, CR, and ECR) are mutually exclusive groups (DTR category excludes any isolates that are only carbapenem resistant)  
‡Conservative treatment duration as per guideline review and clinical practice recommendations. Since no specific guidelines exist for bacteremia due to antibiotic-resistant gram-negative pathogens, a 14-day treatment course was selected arbitrarily<sup>3-6</sup>

**Figure S2: Species Level Comparisons of DTR-GNI and CR-GNI**

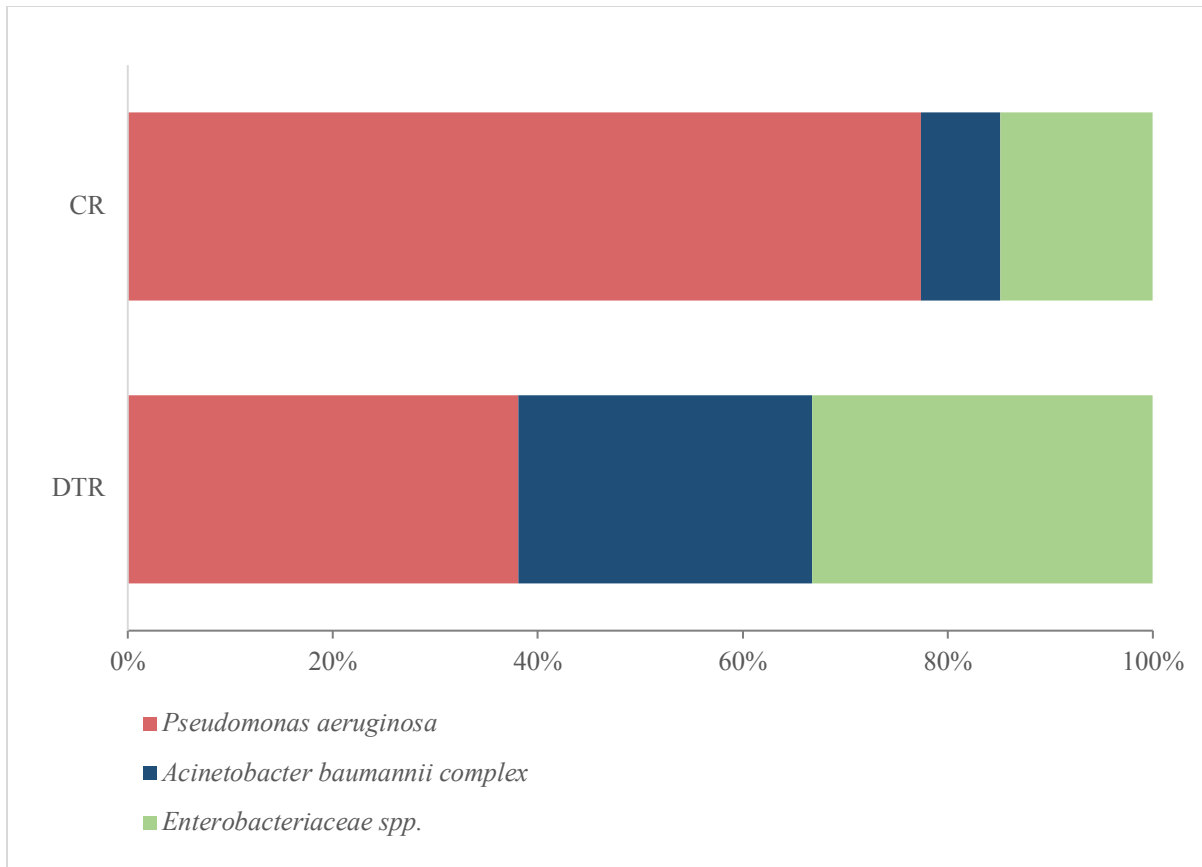

**Legend:** Species level comparisons were done between GNI with DTR and CR phenotypes. *Pseudomonas aeruginosa* makes up a disproportionately higher percentage of the CR market (77%) as compared to the DTR market (38%) implying that there are a significant number of CR-*Pseudomonas aeruginosa* infections that have a first line agent available. DTR and CR are treated as mutually exclusive groups (the CR category excludes any isolates that classify as DTR).

**Table S8: DTR-GNI Treatment Opportunities for *Stenotrophomonas maltophilia*\*, *Burkholderia* spp., and *Achromobacter* spp. †**

| Culture Site                                 | <i>Stenotrophomonas maltophilia</i> |             |                      |             | <i>Burkholderia</i> spp. |             | <i>Achromobacter</i> spp. |             |
|----------------------------------------------|-------------------------------------|-------------|----------------------|-------------|--------------------------|-------------|---------------------------|-------------|
|                                              | Episodes†                           | DOT†        | Additional Episodes‡ | DOT‡        | Episodes                 | DOT         | Episodes                  | DOT         |
| Urinary (5 DOT)                              | 2                                   | 10          |                      |             | 0                        | 0           | 0                         | 0           |
| Intra-abdominal (7 DOT)                      | 0                                   | 0           |                      |             | 0                        | 0           | 0                         | 0           |
| Lower Respiratory (8 DOT)                    | 15                                  | 120         |                      |             | 19                       | 152         | 11                        | 88          |
| Skin Soft Tissue (5 DOT)                     | 1                                   | 5           |                      |             | 0                        | 0           | 0                         | 0           |
| Other (5 DOT)                                | 0                                   | 0           |                      |             | 0                        | 0           | 0                         | 0           |
| Primary Bloodstream (14 DOT)                 | 1                                   | 14          | 8§                   | 112         | 1                        | 14          | 0                         | 0           |
| Secondary Bloodstream (14 DOT)               | 0                                   | 0           |                      |             | 0                        | 0           | 0                         | 0           |
| <b>Total</b>                                 | <b>19</b>                           | <b>149</b>  | <b>8</b>             | <b>112</b>  | <b>19</b>                | <b>152</b>  | <b>11</b>                 | <b>88</b>   |
| <b>Days of therapy per 10,000 encounters</b> |                                     | <b>0·50</b> |                      | <b>0·37</b> |                          | <b>0·51</b> |                           | <b>0·29</b> |

\*Hierarchical algorithm for generating market size estimates was applied to a dataset that included only the organism of interest individually

† There were 3,652 *Stenotrophomonas maltophilia*, 315 *Burkholderia* spp., and 128 *Achromobacter* spp. isolates prior to hierarchical selection of resistant isolates

‡ Trimethoprim-sulfamethoxazole resistance required to meet DTR definition, testing for carbapenem resistance not required

§ Trimethoprim-sulfamethoxazole resistance not required (modified DTR definition for *Stenotrophomonas maltophilia* bloodstream isolates), testing for carbapenem resistance not required

§ When trimethoprim-sulfamethoxazole resistance is not required 8 additional bloodstream infections were identified for a total of 9 primary bloodstream infections.

**Figure S3: Episodes and Targeted Treatment Opportunities for ECR-GNI and Crude Mortality**

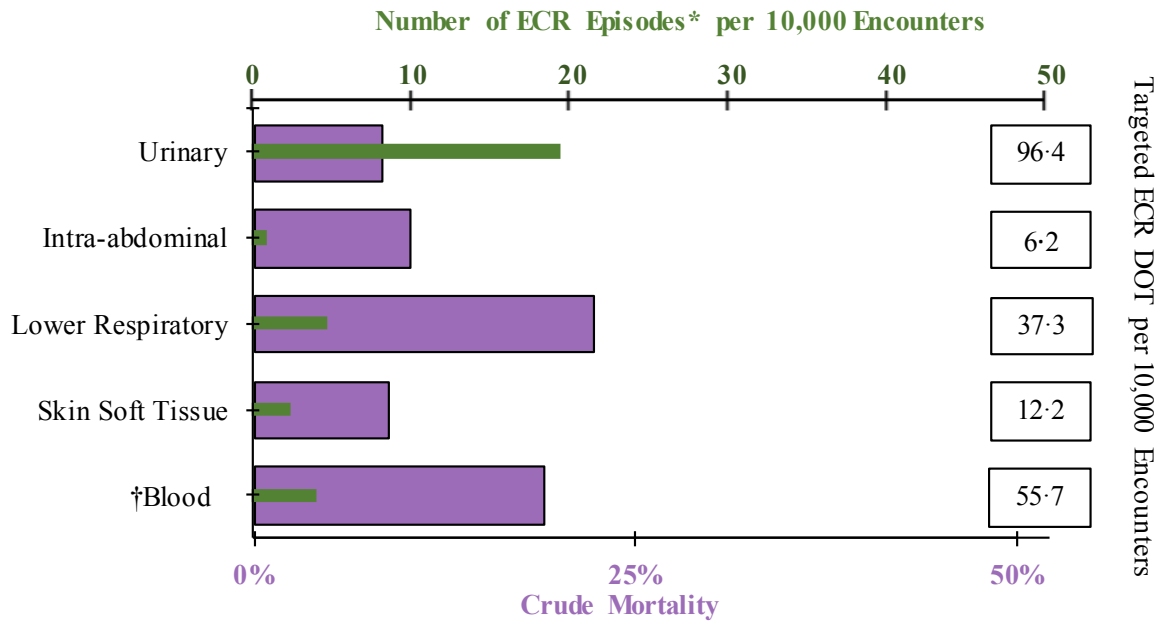

**Legend:** Mortality estimates were compared with prevalence of ECR infection by site. Thin dark green bars represent ECR episodes per 10,000 encounters by site. Thick purple bars represent associated ECR mortality. While lower respiratory had the highest mortality, urinary was the most prevalent.

\* Includes all infection types per site. "Other" infection site not included in this visualization.

† 39 of 226 (17.3%) bloodstream infections are secondary to urinary (n=25), lower respiratory (n=7), skin and soft tissue (n=5), and intra-abdominal (n=2) sites

**Table S9: Reliability Adjusted DTR-GNI DOT Rates and Absolute Burden by Hospital Characteristics**

| Hospital Category                            | Reliability Adjusted |              | Unadjusted         |              |
|----------------------------------------------|----------------------|--------------|--------------------|--------------|
|                                              | DOT/10k Encounters   | Absolute DOT | DOT/10k Encounters | Absolute DOT |
| West, 300+ Beds, Teaching Hospital           | 73·1                 | 121          | 73·8               | 122          |
| West, 300+ Beds, Non-Teaching Hospital       | 70·0                 | 495          | 70·2               | 496          |
| Midwest, 100-299 Beds, Teaching Hospital     | 59·9                 | 895          | 59·9               | 896          |
| South, 300+ Beds, Teaching Hospital          | 54·4                 | 3,678        | 54·5               | 3,682        |
| Northeast, 300+ Beds, Teaching Hospital      | 42·2                 | 2,024        | 42·2               | 2,025        |
| South, <100 Beds, Non-Teaching Hospital      | 24·4                 | 93           | 24·5               | 184          |
| Northeast, 100-299 Beds, Non-Teaching        | 23·7                 | 292          | 23·7               | 293          |
| Northeast, 100-299 Beds, Teaching            | 21·0                 | 504          | 21·0               | 503          |
| West, <100 Beds, Non-Teaching Hospital       | 19·7                 | 207          | 19·7               | 253          |
| South, 100-299 Beds, Non-Teaching Hospital   | 19·6                 | 368          | 19·6               | 384          |
| Midwest, 300+ Beds, Teaching Hospital        | 19·4                 | 217          | 19·4               | 269          |
| South, 100-299 Beds, Teaching Hospital       | 16·8                 | 482          | 16·8               | 481          |
| West, 100-299 Beds, Teaching Hospital        | 12·9                 | 56           | 12·8               | 56           |
| Northeast, <100 Beds, Teaching Hospital      | 10·5                 | 27           | 10·4               | 29           |
| Midwest, 300+ Beds, Non-Teaching Hospital    | 9·9                  | 119          | 9·8                | 118          |
| Midwest, 100-299 Beds, Non-Teaching Hospital | 7·1                  | 23           | 6·9                | 29           |
| West, 100-299 Beds, Non-Teaching Hospital    | 5·6                  | 43           | 5·5                | 49           |
| Midwest, <100 Beds, Non-Teaching Hospital    | 4·1                  | 2            | 3·7                | 10           |
| Northeast, <100 Beds, Non-Teaching Hospital  | 0·5                  | 2            | --                 | 0            |

**Legend:** All 120 hospitals with presumed infections were grouped based on hospital characteristics including hospital size, teaching status, and region. Reliability adjustments were performed using random effects logistic regression to evaluate DTR-DOT rates of treatment opportunities by hospital characteristics. This method shrinks estimates towards the mean based on the reliability of individual hospital estimates. Teaching hospitals with bed size in the West had the highest rate of DTR-DOT while teaching hospitals from the south with 300+ beds had the highest absolute burden. Confidence intervals not calculated because of random effects model.



**Figure S4: Plot of DTR Days of Therapy Rates by Hospital Admissions and Characteristics**

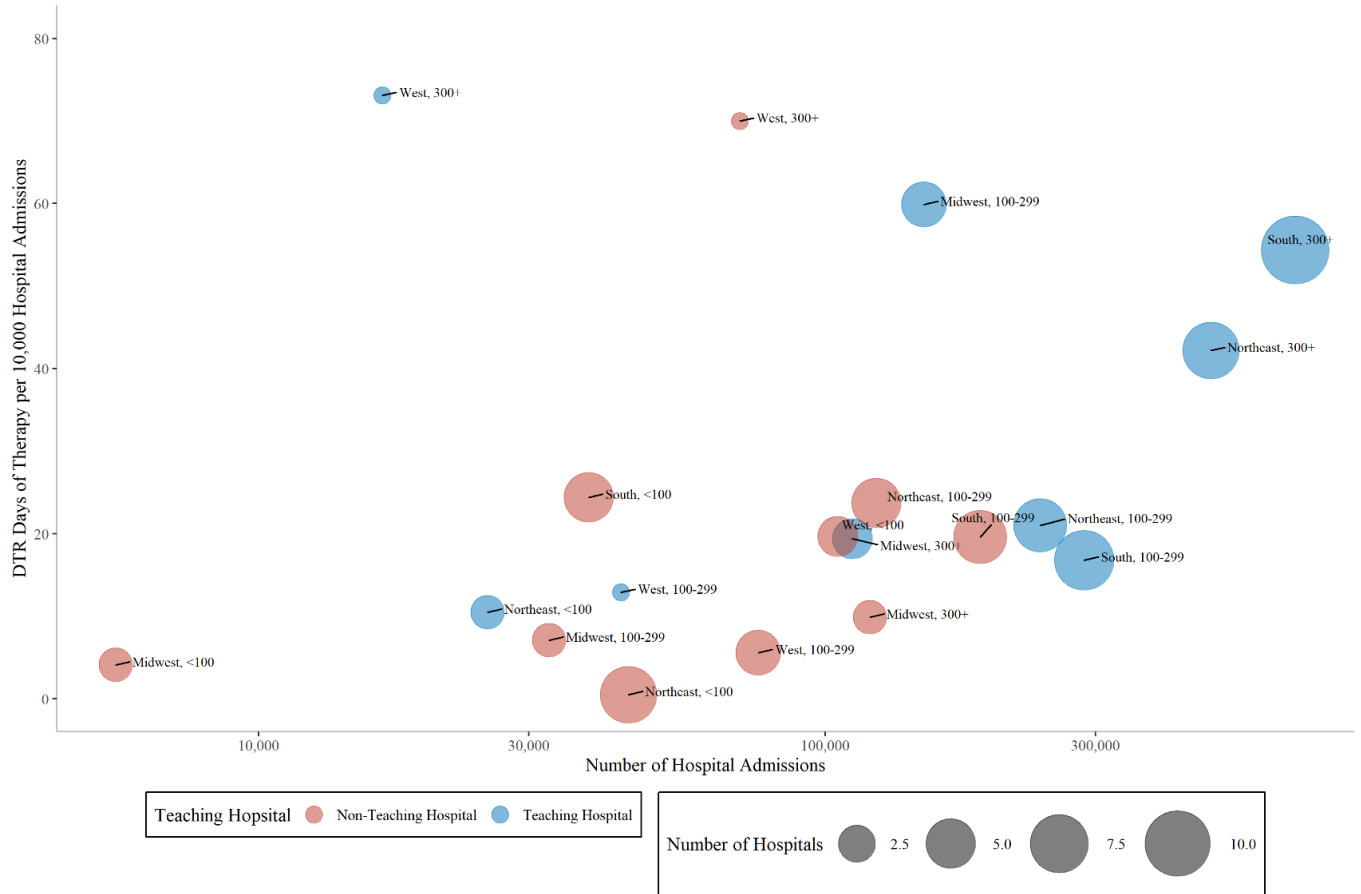

**Legend:** Hospitals were grouped based on teaching status, bed-size, and geographic region. Random effects logistic regression was used to calculate an adjusted DTR DOT rate per 10,000 DOT encounters for each hospital group. The size of each circle indicates the number of hospitals represented in each group. Blue circles indicate teaching hospitals and red indicate non-teaching. The highest rate of DTR was observed in teaching hospitals in the west with 300+ beds (adjusted rate of 73.1 DTR episodes/10,000 DOT).

**Figure S5: Partitioning Analysis Evaluating Hospital Characteristics Associated with Likelihood of Encountering a DTR-GNI**

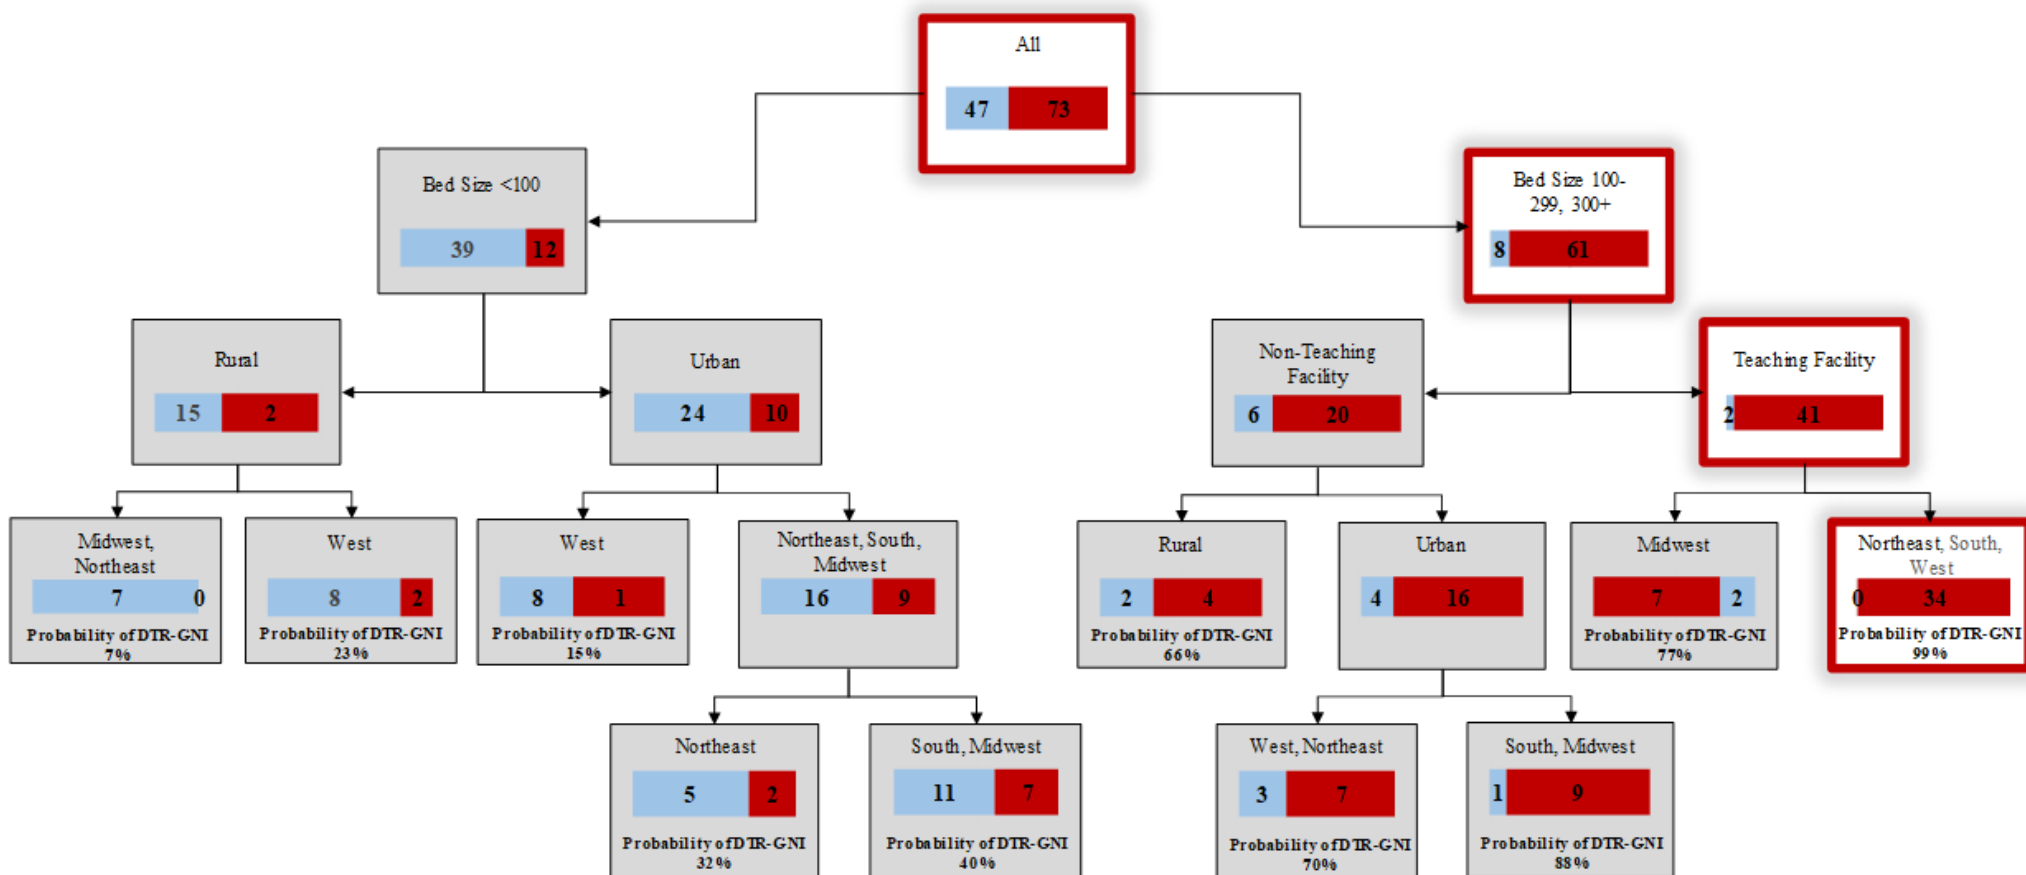

**Legend:** Recursive partition analysis was used to build a decision tree to predict hospital characteristics associated with the likelihood a hospital would encounter at least one episode of DTR-GNI. Each node represents an individual partition in which variables are conditionally selected based on results of prior node. Percentage displayed in each terminal node represents the probability of having a DTR-GNI encounter at a hospital with the respective characteristics as partitioned. Of the 120 hospitals with a presumed infection episode 73 had at least one DTR-GNI from 2009-2015 and 47 had no DTR episodes. The factor most associated with likelihood of DTR episodes at a hospital was bed size  $\geq 100$ .

**Figure S6: Boxplot Distribution of Difficult-to-Treat Resistance (DTR) Episodes per Hospital by Quarter**

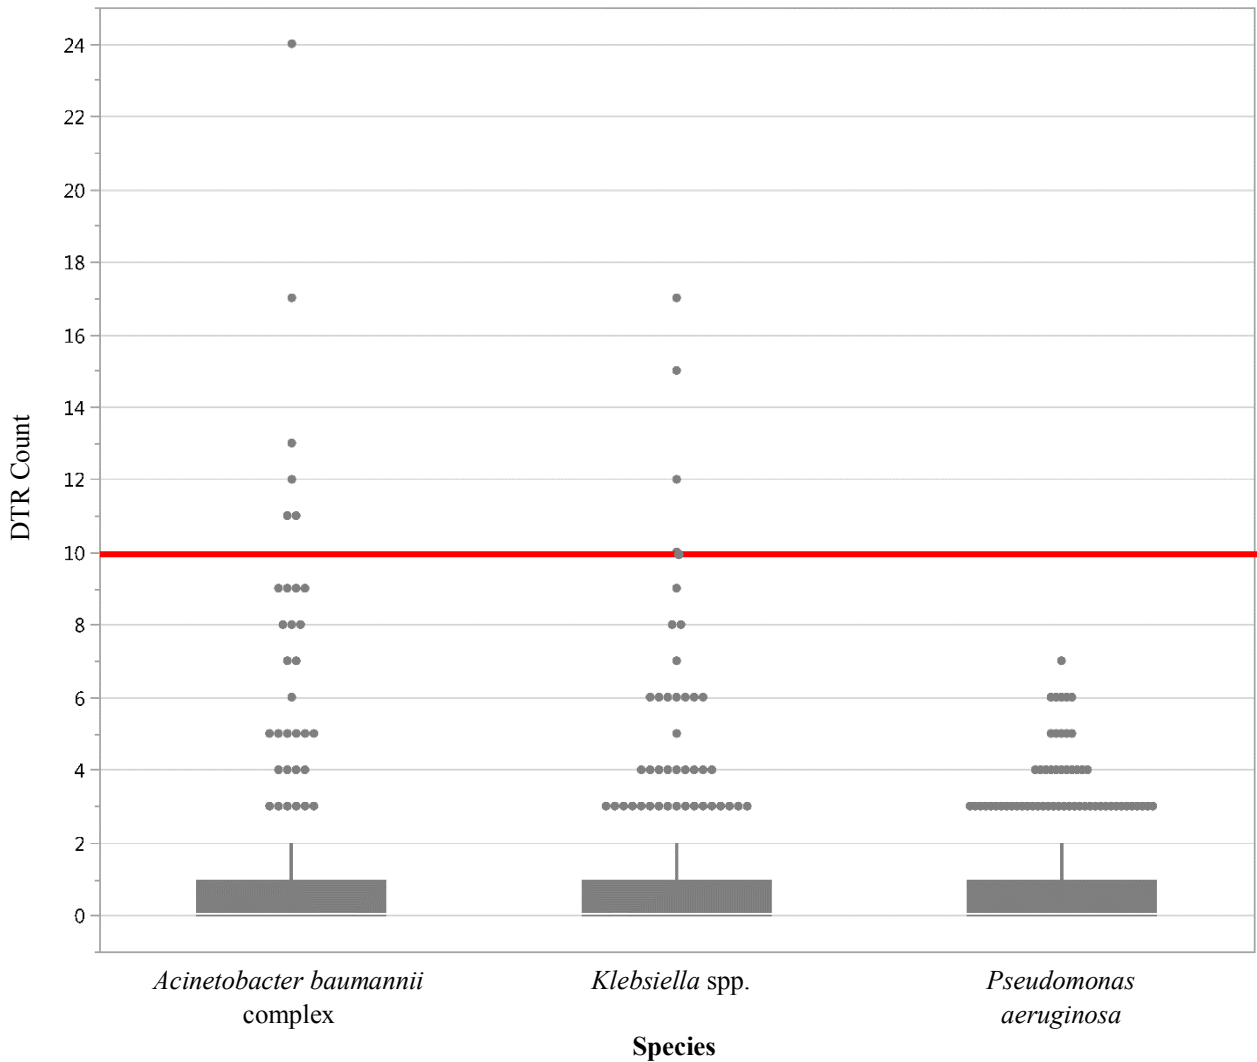

**Legend:** Hospitals were clustered and evaluated by quarter to identify species-level outbreaks. The red line represents a *post hoc* “outbreak threshold” defined as hospital quarters with 10 or more DTR episodes per organism. DTR-*Acinetobacter baumannii* complex was the species with the highest number of episodes in a single quarter (24) and six hospital quarters with outbreaks across 2 hospitals. DTR-*Klebsiella* species had a maximum of 17 per quarter and four hospital quarters with an outbreak across 2 hospitals, while *Pseudomonas aeruginosa* had a maximum of seven per quarter and no hospital outbreaks.

**Table S10: Comparison of *Cerner Healthfacts* Database Cohort Hospital Characteristics with American Hospital Association (AHA) Hospital Statistics**

| Characteristics        | Cerner Hospitals in Study |    | AHA – 2015* |    |
|------------------------|---------------------------|----|-------------|----|
|                        | N                         | %  | N           | %  |
|                        | 132                       |    | 5,280       |    |
| <b>Region</b>          |                           |    |             |    |
| Midwest                | 27                        | 20 | 1,510       | 29 |
| Northeast              | 32                        | 24 | 648         | 12 |
| South                  | 44                        | 33 | 2,133       | 40 |
| West                   | 29                        | 22 | 989         | 19 |
| <b>Urban Location</b>  | 101                       | 77 | 3,393       | 64 |
| <b>Teaching Status</b> |                           |    |             |    |
| Non-Teaching           | 81                        | 61 | 3,450       | 65 |
| Teaching†              | 51                        | 39 |             |    |
| Major Teaching‡        |                           |    | 267         | 5  |
| Minor Teaching§        |                           |    | 1,563       | 30 |
| <b>Bed Capacity</b>    |                           |    |             |    |
| <100                   | 58                        | 44 | 2,941       | 56 |
| 100-299                | 45                        | 34 | 1,552       | 29 |
| 300+                   | 29                        | 22 | 787         | 15 |

\* AHA community hospitals defined as nonfederal, short-term care hospitals open to the general public regardless of teaching status<sup>7</sup>

†affiliated with an *Association of American Medical Colleges (AAMC)* accredited medical school

‡member of AAMC's Council of Teaching Hospitals

§medical school affiliation reported to *American Medical Association (AMA)*, training approved by *American Osteopathic Association (AOA)*, at least 1 *Accreditation Council for Graduate Medical Education (ACGME)* accredited program.

**Table S11: ICD Codes Used to Define Mechanical Ventilation and Neutropenia**

| Type   | Mechanical Ventilation | Neutropenia |
|--------|------------------------|-------------|
| ICD 9  | 96·7                   | 288·00      |
|        | 96·71                  | 288·04      |
|        | 96·72                  |             |
| ICD 10 | 5A1935Z                | D70·3       |
|        | 5A1945Z                | D70·9       |
|        | 5A1955Z                |             |

**Figure S7: Data Curation Effects on Study Population**

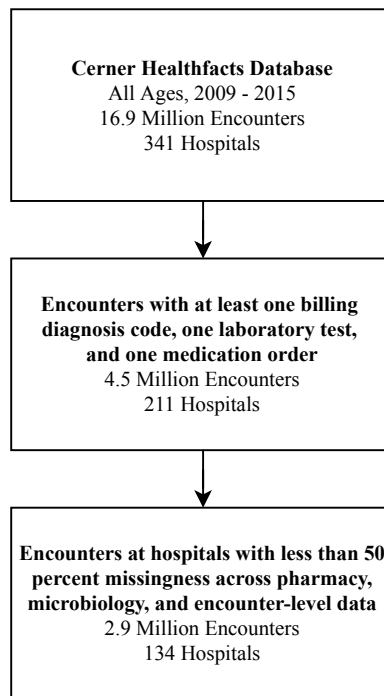

Legend: The flowchart presents the stepwise drop in the sample size of the study population with each data curation step using rules set *a priori* to maximize use of more complete data at the encounter and hospital level.

## References:

1. DeShazo JP, Hoffman MA. A comparison of a multistate inpatient EHR database to the HCUP Nationwide Inpatient Sample. *BMC Health Serv Res* 2015;15:384.
2. Kadri SS, Adjemian J, Lai YL, et al. Difficult-to-Treat Resistance in Gram-negative Bacteremia at 173 US Hospitals: Retrospective Cohort Analysis of Prevalence, Predictors, and Outcome of Resistance to All First-line Agents. *Clin Infect Dis* 2018;67:1803-14.
3. Hooton TM, Bradley SF, Cardenas DD, et al. Diagnosis, prevention, and treatment of catheter-associated urinary tract infection in adults: 2009 International Clinical Practice Guidelines from the Infectious Diseases Society of America. *Clin Infect Dis* 2010;50:625-63.
4. Kalil AC, Metersky ML, Klompas M, et al. Management of Adults With Hospital-acquired and Ventilator-associated Pneumonia: 2016 Clinical Practice Guidelines by the Infectious Diseases Society of America and the American Thoracic Society. *Clin Infect Dis* 2016;63:e61-e111.
5. Solomkin JS, Mazuski JE, Bradley JS, et al. Diagnosis and management of complicated intra-abdominal infection in adults and children: guidelines by the Surgical Infection Society and the Infectious Diseases Society of America. *Clin Infect Dis* 2010;50:133-64.
6. Stevens DL, Bisno AL, Chambers HF, et al. Practice guidelines for the diagnosis and management of skin and soft tissue infections: 2014 update by the Infectious Diseases Society of America. *Clin Infect Dis* 2014;59:e10-52.
7. 2019 AHA Hospital Statistics; AHADataviewer.com based on FY2015 AHA Annual Survey Database. Chicago: Health Forum aAHAa, 2019.
